# Supplementary material for: Metal carbide/Ni hybrids for high-performance electromagnetic absorption and absorption-based electromagnetic interference shielding
Source: Royal Society of Chemistry journal article supplement (doi:10.1039/d0qi00687d), 2020-01-01
Supplement: d0qi00687d1.pdf [file d0qi00687d1.pdf]

## Electronic Supplementary Information (ESI) for

### **Metal carbide/Ni hybrids for high-performance electromagnetic absorption and absorption-based electromagnetic interference shielding**

*Qindong Xie,<sup>†</sup> Zhiyang Yan,<sup>‡</sup> Feng Qin,<sup>\*‡</sup> Le Wang,<sup>†</sup> Lin Mei,<sup>†</sup> Yanpei Zhang,<sup>†</sup> Zhongke Wang,<sup>†</sup> Guangtao Zhao,<sup>†</sup> and Ruibin Jiang<sup>\*‡</sup>*

<sup>†</sup>Shaanxi Key Laboratory for Advanced Energy Devices, Shaanxi Engineering Lab for Advanced Energy Technology, School of Materials Science and Engineering, Shaanxi Normal University, Xi'an 710119, China

<sup>‡</sup>Key Laboratory of Science and Technology on Complex Electromagnetic Environment, China Academy of Engineering Physics, Mianyang 621900, China

## Contents

|                                                                                                                                                                                      |     |
|--------------------------------------------------------------------------------------------------------------------------------------------------------------------------------------|-----|
| 1. Experimental Details .....                                                                                                                                                        | S3  |
| 1.1. Materials .....                                                                                                                                                                 | S3  |
| 1.2. Preparation of $Ti_3C_2T_x$ MXene.....                                                                                                                                          | S3  |
| 1.3. Preparation of $Ti_3C_2T_x/Ni$ Hybrid Nanostructures .....                                                                                                                      | S3  |
| 1.4. Fabrication of Free-Standing $Ti_3C_2T_x/Ni$ Film.....                                                                                                                          | S4  |
| 1.5. Characterization.....                                                                                                                                                           | S4  |
| 1.6. Electromagnetic Absorption and Electromagnetic Interference Shielding Measurements .....                                                                                        | S5  |
| 2. Supporting Figures and Tables.....                                                                                                                                                | S6  |
| Figure S1. a) Large magnification TEM image of $Ti_3C_2T_x$ nanosheet. b) HRTEM taken on a nanoparticle on $Ti_3C_2T_x$ nanosheet.....                                               | S6  |
| Figure S2. Thickness distribution of MXene nanosheets .....                                                                                                                          | S6  |
| Figure S3. FTIR spectra of $Ti_3C_2T_x$ MXene and $Ti_3C_2T_x$ MXene/Ni-5.....                                                                                                       | S6  |
| Figure S4. a) Electrical conductivity of $Ti_3C_2T_x$ MXene and $Ti_3C_2T_x$ MXene/Ni hybrid nanostructure with different Ni loading. b) Conductance loss of different samples. .... | S7  |
| Figure S5. Cole-Cole figure of different samples.....                                                                                                                                | S7  |
| Figure S6. Values of $\mu''(\mu')-2f-1$ for the composites vs. frequency .....                                                                                                       | S7  |
| Figure S7. Reflection loss at different thicknesses. a) $Ti_3C_2T_x$ MXene. b–d) $Ti_3C_2T_x$ MXene/Ni-1, MXene/Ni-5, and MXene/Ni-10, respectively .....                            | S8  |
| Figure S8. Film of $Ti_3C_2T_x$ MXene/Ni-5. a) Photograph of the film on filter paper. b,c) Photograph of the film lifted off the filter paper. ....                                 | S9  |
| Figure S9. Tensile stress-strain curves of $Ti_3C_2T_x$ MXene and $Ti_3C_2T_x$ MXene/Ni hybrid nanostructure with different amounts of Ni loading.....                               | S9  |
| Table S1. Relationship between shielding effectiveness (dB) and shielding efficiency (%) .....                                                                                       | S10 |
| Table S2. EMI shielding materials of various materials .....                                                                                                                         | S10 |
| References .....                                                                                                                                                                     | S11 |

## 1. Experimental Details

### 1.1. Materials

Lithium fluoride (LiF, 98.5%, Aladdin), hydrochloric acid (HCl, 36-38%, Sinopharm Chemical Reagent Co., Ltd.), hydrazine monohydrate ( $\text{N}_2\text{H}_4 \cdot \text{H}_2\text{O}$ , 50%, Aladdin), polyvinyl pyrrolidone (PVP, MW  $\sim$ 29000, Aladdin),  $\text{Ti}_3\text{AlC}_2$  Max phase (400 mesh,  $<30.8 \mu\text{m}$ , Laizhou Kai Kai Ceramic Materials Co., Ltd.), nickel chloride hexahydrate ( $\text{NiCl}_2 \cdot 6\text{H}_2\text{O}$ , 98%, Aladdin), ammonia solution ( $\text{NH}_3 \cdot \text{H}_2\text{O}$ , 25%~28%, Sinopharm Chemical Reagent Co., Ltd.), durapore filter membrane (polyvinylidene fluoride (PVDF), pore size  $0.1 \mu\text{m}$ ). All chemical reagents were used directly from commercial suppliers without further processing.

### 1.2. Preparation of $\text{Ti}_3\text{C}_2\text{T}_x$ MXene

$\text{Ti}_3\text{C}_2\text{T}_x$  was synthesized by etching  $\text{Ti}_3\text{AlC}_2$  phase ( $<30.8 \mu\text{m}$ ) with LiF/HCl.<sup>[1]</sup> Specifically, LiF (1 g) and HCl (20 mL, 9 M) were first mixed by stirring in a Teflon vessel.  $\text{Ti}_3\text{AlC}_2$  powder (1 g) was then slowly added into the mixture. The obtained dispersion was kept stirring for 24 h at  $35 \text{ }^\circ\text{C}$ . After the reaction, the resultant was collected by centrifugation at 3500 rpm for 5 min and washed repeatedly with deionized water. Finally, the homogeneous delaminated  $\text{Ti}_3\text{C}_2\text{T}_x$  supernatant was obtained by sonication for 1 h under Ar flow, followed by centrifugation at 3500 rpm for 1 h. The resulting supernatant has  $\text{Ti}_3\text{C}_2\text{T}_x$  concentration of 2 mg/mL.

### 1.3. Preparation of $\text{Ti}_3\text{C}_2\text{T}_x/\text{Ni}$ Hybrid Nanostructures

The  $\text{Ti}_3\text{C}_2\text{T}_x/\text{Ni}$  hybrid nanostructures were prepared through two steps. In the first step,  $\text{Ti}_3\text{C}_2\text{T}_x$  adsorbed  $\text{Ni}^{2+}$  was obtained. Specifically, different amounts of aqueous  $\text{NiCl}_2 \cdot 6\text{H}_2\text{O}$  solution (10 mg/mL) were added into 91.7 mL of  $\text{Ti}_3\text{C}_2\text{T}_x$  (2 mg/mL), followed by the addition of PVP. To obtain Ni contents of 1 wt.%, 5 wt.%, and 10 wt.% in the precursors, the addition amounts of  $\text{NiCl}_2 \cdot 6\text{H}_2\text{O}$  solution were 0.83 mL, 4.15 mL, and 8.3 mL, respectively,

and the corresponding PVP amounts were 10 mg, 30 mg, and 50 mg, respectively. After the addition of  $\text{NiCl}_2 \cdot 6\text{H}_2\text{O}$  solution and PVP, deionized water was added to adjust the total volume of  $\text{Ti}_3\text{C}_2\text{T}_x\text{-Ni}^{2+}$  mixed solutions to 100 mL. The resultant mixture was then stirred at room temperature for 24 h to adsorb  $\text{Ni}^{2+}$  sufficiently. In the second step, the mixed solution was first heated to 60 °C. Hydrazine monohydrate ( $\text{N}_2\text{H}_4 \cdot \text{H}_2\text{O}$ ) was then introduced as the reducing agent. After 5 min, 0.5 mL of  $\text{NH}_3 \cdot \text{H}_2\text{O}$  was added. The mixture solution was kept at 60 °C for 5 hours to produce  $\text{Ti}_3\text{C}_2\text{T}_x/\text{Ni}$  hybrid nanostructures. The samples with Ni contents of 1 wt.%, 5 wt.%, and 10 wt.% were named as  $\text{Ti}_3\text{C}_2\text{T}_x/\text{Ni-1}$ ,  $\text{Ti}_3\text{C}_2\text{T}_x/\text{Ni-5}$ , and  $\text{Ti}_3\text{C}_2\text{T}_x/\text{Ni-10}$ , respectively.

#### *1.4. Fabrication of Free-Standing $\text{Ti}_3\text{C}_2\text{T}_x/\text{Ni}$ Film*

$\text{Ti}_3\text{C}_2\text{T}_x$  and  $\text{Ti}_3\text{C}_2\text{T}_x/\text{Ni}$  films were fabricated through vacuum-assisted filtration with Durapore filter membrane (PVDF, pore size 0.1  $\mu\text{m}$ ). Specifically, different amounts of sample dispersions (5 mg/mL) were filtered until dry for 24–72 h at room temperature to fabricate films with different thickness. Free-standing films were obtained through peeling the film off the filter membrane after the films were dried at room temperature. To study the absorption of different samples toward electromagnetic waves, paraffin-based composites were prepared with different  $\text{Ti}_3\text{C}_2\text{T}_x/\text{Ni}$  hybrid nanostructures.

#### *1.5. Characterization*

The morphologies of samples were characterized by SEM (SU8220, Hitachi, 5 kV), TEM (JEM-2100, JEOL, 200 kV) and AFM (Dimension Icon Bruker). HRTEM imaging was carried out on a JEOL JEM-2100 operating at 200 kV. EDX elemental maps were obtained on an FEI Tecnai F20 microscope equipped with an Oxford EDX analysis system. XRD patterns were conducted on a Rigaku Smartlab (XRD; Rigaku, Miniflex600) diffractometer with  $\text{Cu K}\alpha$  ( $\lambda = 1.5406 \text{ \AA}$ ) radiation. The chemical bonding information was obtained with X-ray

photoelectron spectra (XPS) (Axis Ultra, Kratos Analytical Ltd, Japan) equipped with a monochromatized Al K $\alpha$  X-ray source (1486.6 eV). The binding energy was corrected by the C 1s line at 284.6 eV. Fourier transform infrared spectroscopy (FTIR) were recorded in the range of 400–4000 cm<sup>-1</sup> using a semiconductor parameter analyzer (spectrum two, PerkinElmer, USA). The conductivity of the prepared composites was measured by a four-point probe instrument (RTS-9, Guangzhou, China). EDX for identifying the element contents was carried out on SEM (SU8020, Hitachi, 15 kV) with Horiba EDX Spectrometer.

#### *1.6. Electromagnetic Absorption and Electromagnetic Interference Shielding Measurements*

Paraffin-based composites containing different nanostructures were pressed into a toroidal shape with an inner diameter of 3.00 mm and an outer diameter of 7.00 mm. The dielectric constant and magnetic permeability were measured using two-port vector network analyzer (Rohde & Schwarz ZVB 20, Germany) over the frequency of 2–18 GHz.

Electromagnetic interference shielding of samples was measured using waveguide method by a vector network analyzer (VNA) (Agilent, E8363B, USA) in the X-band. The samples for the S-parameter measurements have diameters of 45 mm. The reflection coefficient  $R$ , transmission coefficient  $T$ , and absorption coefficient  $A$  were determined from S parameters as follows:  $T = |S_{12}|^2 = |S_{21}|^2$ ,  $R = |S_{11}|^2 = |S_{22}|^2$ , and  $A = 1 - R - T$ , where  $S_{11}$ ,  $S_{22}$ ,  $S_{12}$ , and  $S_{21}$  are input reflection, output reflection, reverse transmission, and forward transmission, respectively.

## 2. Supporting Figures and Tables

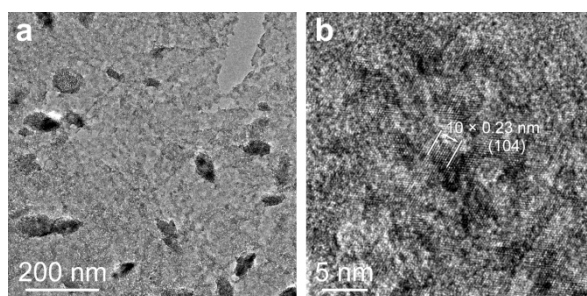

**Figure S1.** a) Large magnification TEM image of  $\text{Ti}_3\text{C}_2\text{T}_x$  nanosheet. b) HRTEM taken on a nanoparticle on  $\text{Ti}_3\text{C}_2\text{T}_x$  nanosheet. The lattice fringes indicate that the nanoparticle is  $\text{Ti}_3\text{C}_2\text{T}_x$ .

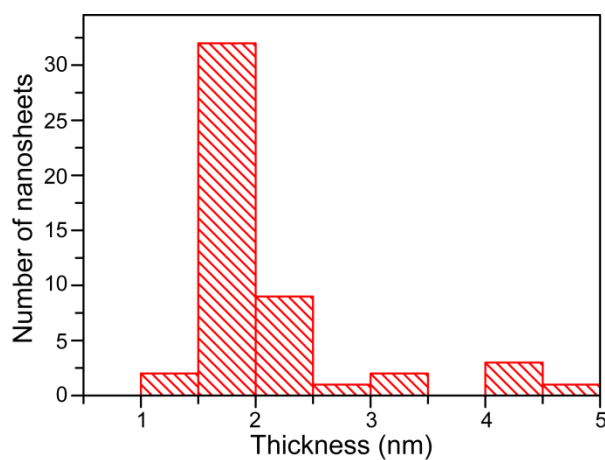

**Figure S2.** Thickness distribution of MXene nanosheets. It can be found that most of MXene nanosheets have thickness in the range of 1.5–2 nm. The thicknesses are obtained from AFM image.

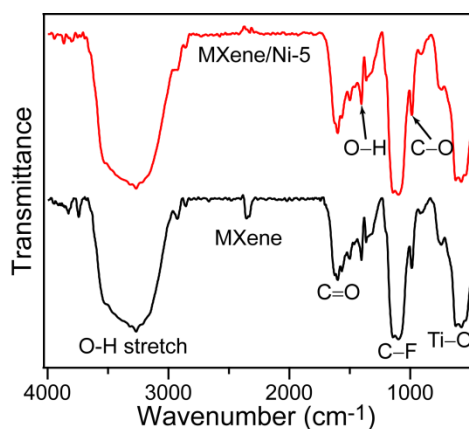

**Figure S3.** FTIR spectra of  $\text{Ti}_3\text{C}_2\text{T}_x$  MXene and  $\text{Ti}_3\text{C}_2\text{T}_x$  MXene/Ni-5.

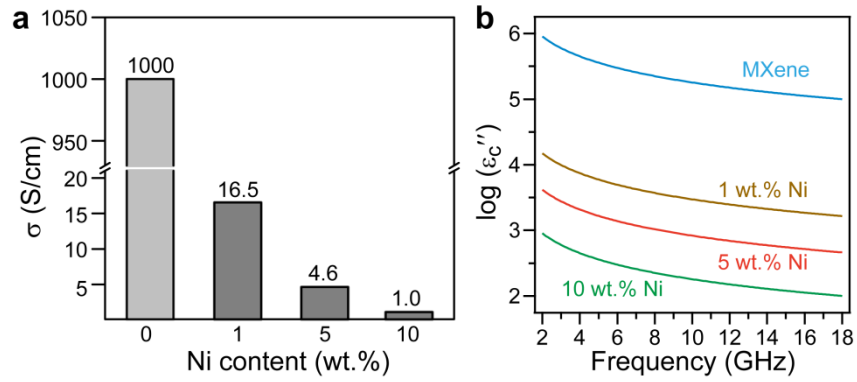

**Figure S4.** a) Electrical conductivity of  $\text{Ti}_3\text{C}_2\text{T}_x$  MXene and  $\text{Ti}_3\text{C}_2\text{T}_x$  MXene/Ni hybrid nanostructure with different Ni loading. b) Conductance loss of different samples.

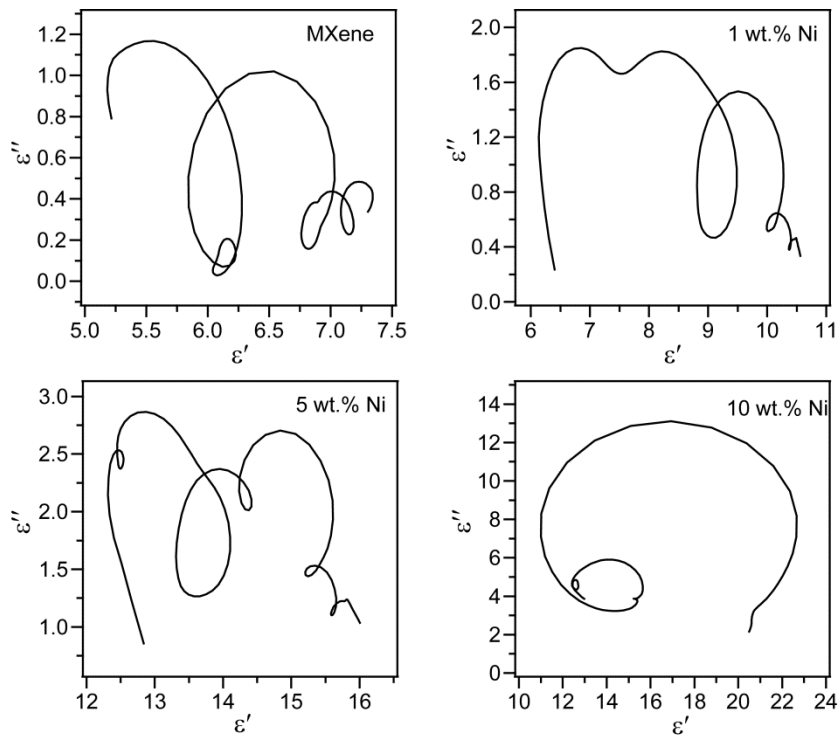

**Figure S5.** Cole-Cole figure of different samples.

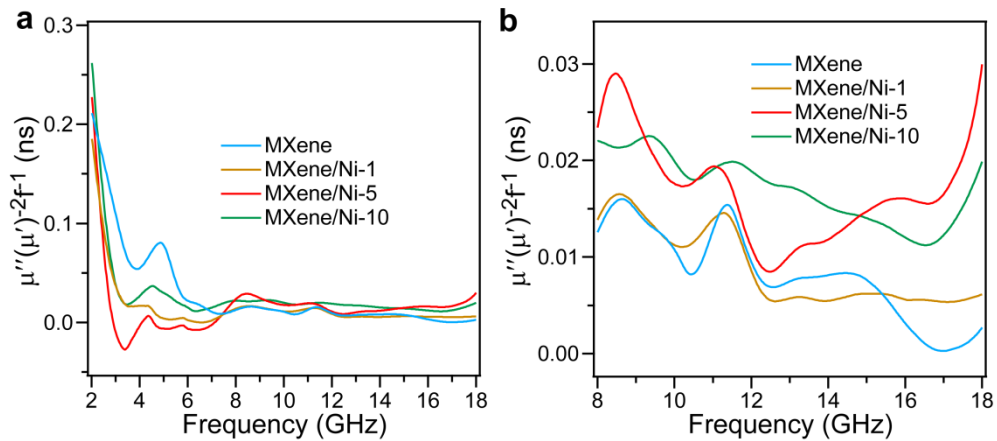

**Figure S6.** Values of  $\mu''(\mu')^{-2}f^1$  for the composites vs. frequency. a) Values of  $\mu''(\mu')^{-2}f^1$  in the frequency range of 2–18 GHz. b) Enlarged plots in the frequency range of 8–18 GHz.

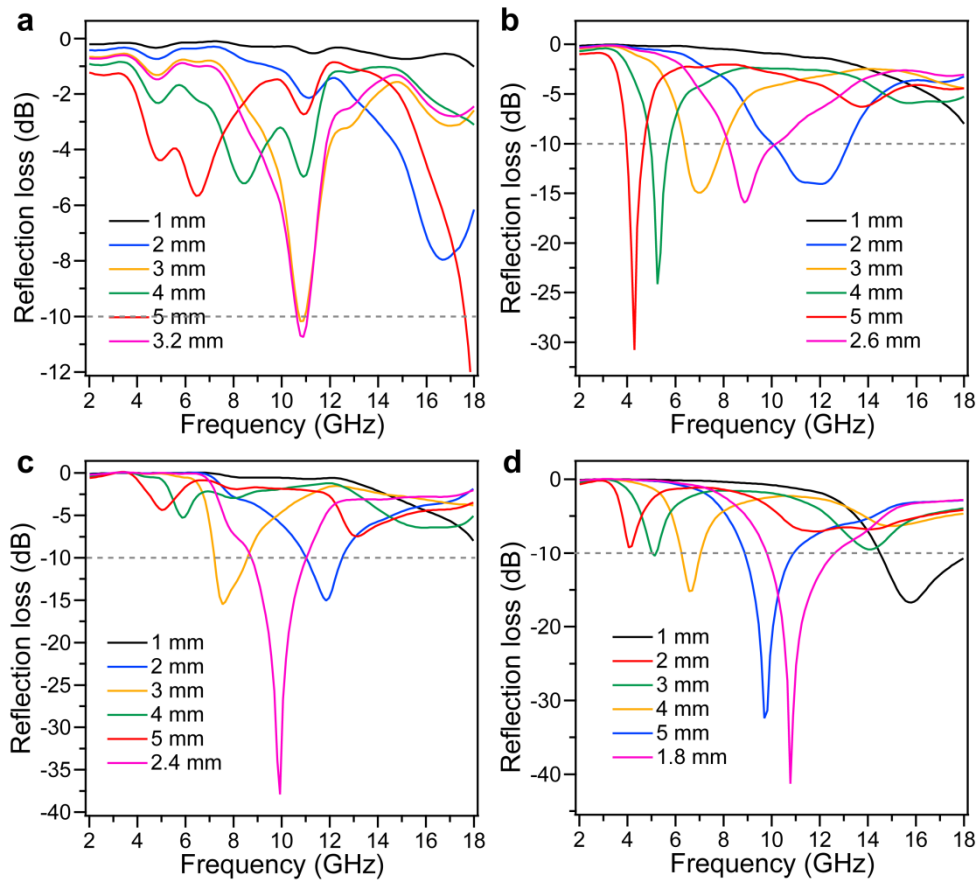

**Figure S7.** Reflection loss at different thicknesses. a)  $\text{Ti}_3\text{C}_2\text{T}_x$  MXene. b–d)  $\text{Ti}_3\text{C}_2\text{T}_x$  MXene/Ni-1, MXene/Ni-5, and MXene/Ni-10, respectively. The gray dashed lines indicate the RL value of -10 dB.



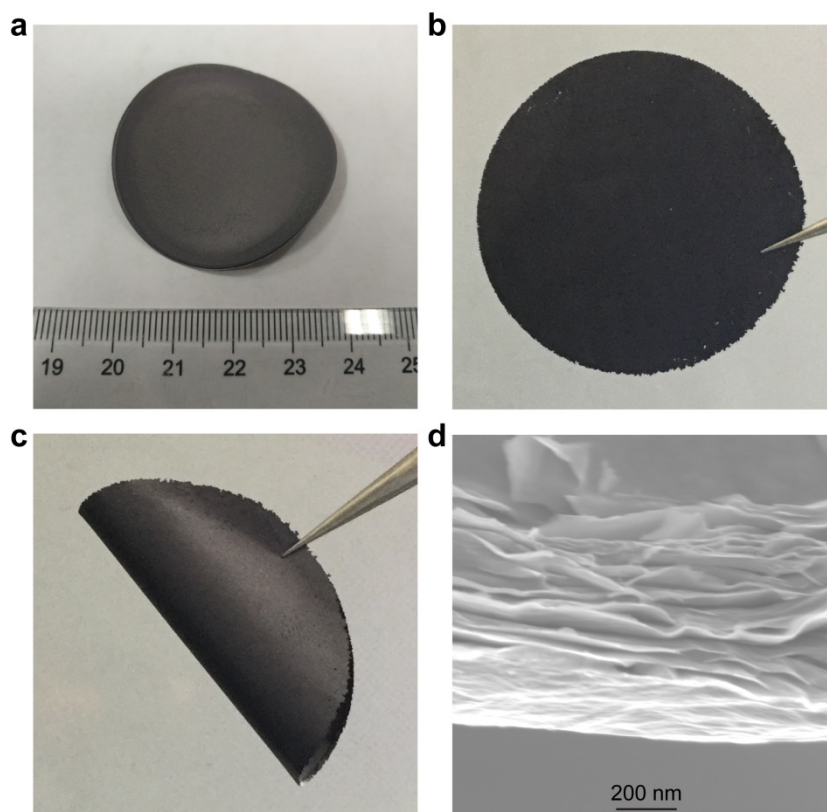

**Figure S8.** Film of  $\text{Ti}_3\text{C}_2\text{T}_x$  MXene/Ni-5. a) Photograph of the film on filter paper. b,c) Photograph of the film lifted off the filter paper. It can be found that the film is relatively flexible. d) SEM image of the cross section of the film.

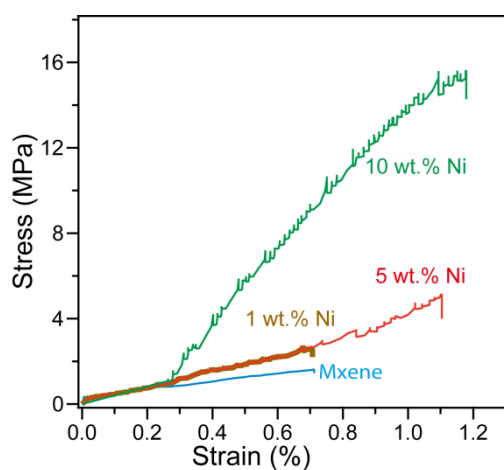

**Figure S9.** Tensile stress-strain curves of  $\text{Ti}_3\text{C}_2\text{T}_x$  MXene and  $\text{Ti}_3\text{C}_2\text{T}_x$  MXene/Ni hybrid nanostructure with different amounts of Ni loading. The strain rate is 1.5 mm/min. The film thicknesses are 50  $\mu\text{m}$ .

**Table S1.** Relationship between shielding effectiveness (dB) and shielding efficiency (%).

| Shielding Effectiveness (dB) | Shielding Efficiency (%) |
|------------------------------|--------------------------|
| 0                            | 0                        |
| 10                           | 90                       |
| 20                           | 99                       |
| 30                           | 99.9                     |
| 40                           | 99.99                    |
| 50                           | 99.999                   |
| 60                           | 99.9999                  |
| 62                           | 99.99994                 |

**Table S2. EMI shielding materials of various materials**

| Materials type | Filler                                              | Filler (wt.%) | Matrix    | Thickness (mm) | EMI SE (dB) | Ref. |
|----------------|-----------------------------------------------------|---------------|-----------|----------------|-------------|------|
| MXene film     | Ti <sub>3</sub> C <sub>2</sub> T <sub>X</sub>       | 87.5          | Pedot:PSS | 0.0111         | 42.1        | 2    |
|                | Ti <sub>3</sub> C <sub>2</sub> T <sub>X</sub>       | 90            | CNF       | 0.047          | 22          | 3    |
|                | Ti <sub>3</sub> C <sub>2</sub> T <sub>X</sub>       | /             | textile   | 0.43           | 41          | 4    |
|                | Ti <sub>3</sub> C <sub>2</sub> T <sub>X</sub>       | 90            | SA        | 0.008          | 57          | 5    |
|                | Ti <sub>2</sub> CT <sub>X</sub>                     | 30            | wax       | 0.8            | 70          | 6    |
|                | Ti <sub>3</sub> C <sub>2</sub> T <sub>X</sub>       | 1.9 vol.%     | PS        | 2.0            | 62          | 7    |
|                | MWCNT/Ti <sub>3</sub> C <sub>2</sub> T <sub>X</sub> | /             | PVA&PSS   | 0.00017        | 2.8         | 8    |
|                | SWCNT/Ti <sub>3</sub> C <sub>2</sub> T <sub>X</sub> | /             | PVA&PSS   | 0.000207       | 3.34        | 8    |
| MXene foam     | Ti <sub>3</sub> C <sub>2</sub> T <sub>X</sub>       | /             | /         | 0.06           | 71          | 9    |
|                | Ti <sub>3</sub> C <sub>2</sub> T <sub>X</sub>       | 90            | CA        | 0.026          | 54.3        | 10   |
|                | Ti <sub>2</sub> CT <sub>X</sub>                     | 7.6 vol.%     | PVA       | 0.1            | 47.7        | 11   |
| Metal film     | Co                                                  | 60            | PVDF/CNT  | 0.3            | 35.3        | 12   |
|                | TiN <sub>X</sub>                                    | /             | /         | 0.00147        | >20         | 13   |
|                | Ni                                                  | 20            | PVDF      | 0.3            | 27.6        | 14   |
|                | Ag                                                  | 7.75          | PLA       | 2.7            | 60.4        | 15   |
|                | Ni-CF                                               | /             | PC        | 0.31           | 72.7        | 16   |
|                | Ag                                                  | 5.46          | PU        | 0.36           | 106         | 17   |
|                | Ag/ZnO                                              | 5.7 vol%      | WPU       | 0.5            | 87.2        | 18   |
|                | Ni/GMP                                              | 30            | wax       | 0.7            | 40          | 19   |
| Carbon film    | rGO                                                 | 7             | PS        | 2.5            | 45.1        | 20   |
|                | rGO                                                 | /             | /         | 0.014          | 73.7        | 22   |

|             |              |         |                                               |        |       |           |
|-------------|--------------|---------|-----------------------------------------------|--------|-------|-----------|
|             | graphene     | /       | /                                             | 0.01   | 25    | 23        |
|             | LG paper     | /       | /                                             | 0.0125 | 52.5  | 24        |
|             | MWCNT        | 80      | PU                                            | 2.3    | 46.7  | 25        |
|             | graphene     | 2 vol.% | B <sub>4</sub> C                              | 1.5    | 35    | 26        |
|             | CNT          | 5       | PVDF                                          | 0.1    | 22.41 | 27        |
|             | CNT          | 8       | PVDF                                          | 0.1    | 25.02 | 27        |
|             | CNT/graphene | 5/10    | PVDF                                          | 0.1    | 27.58 | 27        |
|             | rGO          | /       | TiO <sub>2</sub> /SiO <sub>2</sub> /PPy       | 0.244  | 30    | 28        |
|             | graphene     | 3.07    | PDMS                                          | 2.0    | 54    | 29        |
|             | GO/CNT       | 15      | SiCN                                          | 2.0    | 67.2  | 30        |
|             | G/GNT        | /       | UHMWPE                                        | 0.5    | 31.8  | 31        |
| Carbon film | graphene     | /       | /                                             | 2.0    | 48.7  | 32        |
|             | rGo          | 0.66    | epoxy                                         | 2.0    | 33    | 21        |
|             | MWCNT        | 0.5     | epoxy/rubber                                  | 2.0    | 22.9  | 33        |
|             | Ag@C         | /       | /                                             | 3.0    | 70.1  | 34        |
| MXene film  | Ni           | 5       | Ti <sub>3</sub> C <sub>2</sub> T <sub>x</sub> | 0.002  | 22    |           |
|             | Ni           | 5       | Ti <sub>3</sub> C <sub>2</sub> T <sub>x</sub> | 0.005  | 32.6  |           |
|             | Ni           | 5       | Ti <sub>3</sub> C <sub>2</sub> T <sub>x</sub> | 0.01   | 41.05 | This work |
|             | Ni           | 5       | Ti <sub>3</sub> C <sub>2</sub> T <sub>x</sub> | 0.018  | 48.6  |           |
|             | Ni           | 5       | Ti <sub>3</sub> C <sub>2</sub> T <sub>x</sub> | 0.03   | 52.4  |           |
|             | Ni           | 5       | Ti <sub>3</sub> C <sub>2</sub> T <sub>x</sub> | 0.05   | 62.7  |           |

## References:

- [1] M. Alhabeab, K. Maleski, B. Anasori, P. Lelyukh, L. Clark, S. Sin, Y. Gogotsi, *Chem. Mater.* **2017**, *29*, 7633.
- [2] R. T. Liu, M. Miao, Y. H. Li, J. F. Zhang, S. M. Cao, X. Feng, *ACS Appl. Mater. Interfaces* **2018**, *10*, 44787.
- [3] W. T. Cao, F. F. Chen, Y. J. Zhu, Y. G. Zhang, Y. Y. Jiang, M. G. Ma, F. Chen, *ACS Nano* **2018**, *12*, 4583.
- [4] Q. W. Wang, H. B. Zhang, J. Liu, S. Zhao, X. Xie, L. X. Liu, R. Yang, N. Koratkar, Z. Z. Yu, *Adv. Funct. Mater.* **2019**, *29*, 1806819.
- [5] F. Shahzad, M. Alhabeab, C. B. Hatter, B. Anasori, S. M. Hong, C. M. Koo, Y. Gogotsi, *Science* **2016**, *353*, 1137.
- [6] X. Li, X. Yin, S. Liang, M. Li, L. Cheng, L. Zhang, *Carbon* **2019**, *146*, 210.
- [7] R. Sun, H. B. Zhang, J. Liu, X. Xie, R. Yang, Y. Li, S. Hong, Z. Z. Yu, *Adv. Funct. Mater.* **2017**, *27*, 1702807.
- [8] G. M. Weng, J. Li, M. Alhabeab, C. Karpovich, H. Wang, J. Lipton, K. Maleski, J. Kong, E. Shauly, M. Elimelech, Y. Gogotsi, A. D. Taylor, *Adv. Funct. Mater.* **2018**, *28*, 1803360.
- [9] J. Liu, H. B. Zhang, R. Sun, Y. Liu, Z. Liu, A. Zhou, Z. Z. Yu, *Adv. Mater.* **2017**, *29*, 1702367.
- [10] Z. Zhou, J. Liu, X. Zhang, D. Tian, Z. Zhan, C. Lu, *Adv. Mater. Interfaces* **2019**, 1802040.

- [11] H. Xu, X. Yin, X. Li, M. Li, S. Liang, L. Zhang, L. Cheng, *ACS Appl. Mater. Interfaces* **2019**, *11*, 10198.
- [12] X. Li, S. Zeng, S. E. L. Liang, Z. Bai, Y. Zhou, B. Zhao, R. Zhang, *ACS Appl. Mater. Interfaces* **2018**, *10*, 40789.
- [13] L. Lu, F. Luo, Y. Qing, W. Zhou, D. Zhu, J. Dong, *Appl. Phys. A* **2018**, *124*, 721.
- [14] B. Zhao, S. Zeng, X. Li, X. Guo, Z. Bai, B. Fan, R. Zhang, *J. Mater. Chem. C*, **2020**, *8*, 500.
- [15] X. Huang, B. Dai, Y. Ren, J. Xu, P. Zhu, *J. Nanomater.* **2015**, *2015*, 320306.
- [16] D. Xing, L. Lu, K. S. Teh, Z. Wan, Y. Xie, Y. Tang, *Carbon* **2018**, *132*, 32.
- [17] L. C. Jia, L. Xu, F. Ren, P. G. Ren, D. X. Yan, Z. M. Li, *Carbon* **2019**, *144*, 101.
- [18] Y. Xu, Y. Yang, D. X. Yan, H. Duan, G. Zhao, Y. Liu, *ACS Appl. Mater. Interfaces* **2018**, *10*, 19143.
- [19] H. J. Im, G. H. Jun, D. J. Lee, H. J. Ryu, S. H. Hong, *J. Mater. Chem. C* **2017**, *5*, 6471.
- [20] D. X. Yan, H. Pang, B. Li, R. Vajtai, L. Xu, P. G. Ren, J. H. Wang, Z. M. Li, *Adv. Funct. Mater.* **2015**, *25*, 559.
- [21] Y. Chen, H. B. Zhang, Y. Yang, M. Wang, A. Cao, Z. Z. Yu, *Adv. Funct. Mater.* **2016**, *26*, 447.
- [22] S. Lin, S. Ju, J. Zhang, G. Shi, Y. He, D. Jiang, *RSC Adv.* **2019**, *9*, 1419.
- [23] S. Wana, Y. Lia, J. Muc, A. E. Aliev, S. Fang, N. A. Kotov, L. Jiang, Q. Cheng, R. H. Baughman, *Proc. Natl. Acad. Sci. U. S. A.* **2018**, *115*, 5359.
- [24] Y. J. Wan, P. L. Zhu, S. H. Yu, R. Sun, C. P. Wong, W. H. Liao, *Carbon* **2017**, *122*, 74.
- [25] Z. Zeng, H. Jin, M. Chen, W. Li, L. Zhou, X. Xue, Z. Zhang, *Small* **2017**, *13*, 1701388.
- [26] Y. Q. Tan, H. Luo, X. S. Zhou, S. M. Peng, H. B. Zhang, *RSC Adv.* **2018**, *8*, 39314.
- [27] B. Zhao, C. Zhao, R. Li, S. M. Hamidinejad, C. B. Park, *ACS Appl. Mater. Interfaces* **2017**, *9*, 20873.
- [28] L. Huang, J. Li, Y. Li, X. He, Y. Yuan, *Nanoscale* **2019**, *11*, 8616.
- [29] F. Xu, R. Chen, Z. Lin, Y. Qin, Y. Yuan, Y. Li, X. Zhao, M. Yang, X. Sun, S. Wang, Q. Peng, Y. Li, X. He, *ACS Omega* **2018**, *3*, 3599.
- [30] X. Liu, Z. Yu, R. Ishikawa, L. Chen, X. Liu, X. Yin, Y. Ikuhara, R. Riedel, *Acta Mater.* **2017**, *130*, 83.
- [31] L. C. Jia, D. X. Yan, X. Jiang, H. Pang, J. F. Gao, P. G. Ren, Z. M. Li, *Ind. Eng. Chem. Res.* **2018**, *57*, 11929.
- [32] Z. Zeng, Y. Zhang, X. Y. D. Ma, S. I. S. Shahabadi, B. Che, P. Wang, X. Lu, *Carbon* **2018**, *140*, 227.
- [33] F. Huang, Y. Wang, P. Wang, H. L. Ma, X. Chen, K. Cao, Y. Pei, J. Peng, J. Lia, M. Zhai, *RSC Adv.* **2018**, *8*, 24236.
- [34] Y. J. Wan, P. L. Zhu, S. H. Yu, R. Sun, C. P. Wong, W. H. Liao, *Small* **2018**, *14*, 1800534.
